# Supplementary material for: Comparing Neighborhoods of Children With Autism Spectrum Disorder in a Medicaid Waiver Program and a State Population, 2007–2015
Source: Atypon-hosted journal article supplement (doi:10.1176/appi.ps.201800479), 2019-08-05
Supplement: appi.ps.201800479.ds001.pdf [file appi.ps.201800479.ds001.pdf]

Table in the online supplement

*Significance of covariates from ordinary least squares regression models comparing enrollees' neighborhood characteristics and South Carolina's demographic characteristics (N=2,111)*

| Variable | % White<br>2007       | % White<br>2008       | % White<br>2009       | % White<br>2010       | % White<br>2011       | % White<br>2012       | % White<br>2013       | % White<br>2014       | % White<br>2015       |
|----------|-----------------------|-----------------------|-----------------------|-----------------------|-----------------------|-----------------------|-----------------------|-----------------------|-----------------------|
| Age      | --                    | --                    | --                    | --                    | --                    | --                    | --                    | --                    | --                    |
| Sex      | --                    | --                    | --                    | --                    | --                    | --                    | --                    | --                    | --                    |
| Variable | % BA Degree<br>2007   | % BA Degree<br>2008   | % BA Degree<br>2009   | % BA Degree<br>2010   | % BA Degree<br>2011   | % BA Degree<br>2012   | % BA Degree<br>2013   | % BA Degree<br>2014   | % BA Degree<br>2015   |
| Age      | --                    | --                    | --                    | --                    | --                    | +                     | --                    | --                    | --                    |
| Sex      | --                    | --                    | --                    | --                    | --                    | +                     | --                    | --                    | --                    |
| Black NH | --                    | --                    | --                    | --                    | --                    | *                     | --                    | --                    | --                    |
| Hispanic | --                    | --                    | --                    | --                    | --                    | +                     | --                    | --                    | --                    |
| Other NH | --                    | --                    | --                    | --                    | --                    | +                     | --                    | --                    | --                    |
| Unknown  | --                    | --                    | --                    | --                    | --                    | +                     | --                    | --                    | --                    |
| Variable | Median Income<br>2007 | Median Income<br>2008 | Median Income<br>2009 | Median Income<br>2010 | Median Income<br>2011 | Median Income<br>2012 | Median Income<br>2013 | Median Income<br>2014 | Median Income<br>2015 |
| Age      | --                    | --                    | --                    | --                    | +                     | +                     | +                     | --                    | --                    |
| Sex      | --                    | --                    | --                    | --                    | +                     | +                     | +                     | --                    | --                    |
| Black NH | --                    | --                    | --                    | --                    | *                     | *                     | *                     | --                    | --                    |
| Hispanic | --                    | --                    | --                    | --                    | +                     | *                     | +                     | --                    | --                    |
| Other NH | --                    | --                    | --                    | --                    | +                     | +                     | +                     | --                    | --                    |
| Unknown  | --                    | --                    | --                    | --                    | +                     | +                     | *                     | --                    | --                    |
| Variable | % Female HH<br>2007   | % Female HH<br>2008   | % Female HH<br>2009   | % Female HH<br>2010   | % Female HH<br>2011   | % Female HH<br>2012   | % Female HH<br>2013   | % Female HH<br>2014   | % Female HH<br>2015   |
| Age      | --                    | --                    | +                     | --                    | +                     | +                     | +                     | +                     | --                    |
| Sex      | --                    | --                    | +                     | --                    | +                     | +                     | +                     | +                     | --                    |
| Black NH | --                    | --                    | *                     | --                    | *                     | *                     | *                     | *                     | --                    |
| Hispanic | --                    | --                    | +                     | --                    | +                     | *                     | *                     | *                     | --                    |
| Other NH | --                    | --                    | *                     | --                    | +                     | +                     | *                     | +                     | --                    |
| Unknown  | --                    | --                    | +                     | --                    | +                     | +                     | *                     | +                     | --                    |
| Variable | % Poverty<br>2007     | % Poverty<br>2008     | % Poverty<br>2009     | % Poverty<br>2010     | % Poverty<br>2011     | % Poverty<br>2012     | % Poverty<br>2013     | % Poverty<br>2014     | % Poverty<br>2015     |
| Age      | --                    | --                    | --                    | *                     | --                    | +                     | +                     | --                    | --                    |
| Sex      | --                    | --                    | --                    | +                     | --                    | +                     | +                     | --                    | --                    |
| Black NH | --                    | --                    | --                    | *                     | --                    | *                     | *                     | --                    | --                    |
| Hispanic | --                    | --                    | --                    | +                     | --                    | *                     | *                     | --                    | --                    |
| Other NH | --                    | --                    | --                    | +                     | --                    | +                     | +                     | --                    | --                    |
| Unknown  | --                    | --                    | --                    | +                     | --                    | +                     | *                     | --                    | --                    |

Note. Significance of control variables reported when multivariate model is significant at an alpha level of .006. In multivariate models, the symbol -- represents a non-significant model. In multivariate analyses, the symbol \* represents a significant control variable in a significant model. In bivariate analyses, the symbol \* represents a significant difference. The symbol + represents a non-significant control variable in a significant model.
